# Supplementary material for: Functional properties of flagellin as a stimulator of innate immunity
Source: PubMed Central journal article supplement (PMC4709591; doi:10.1038/srep18379), 2016-01-12
Supplement: srep18379-s1.pdf [file srep18379-s1.pdf]

## SUPPLEMENTARY INFORMATION

### **Functional properties of flagellin as a stimulator of innate immunity**

Yuan Lu<sup>1</sup> and James R. Swartz<sup>1, 2, \*</sup>

*1. Department of Chemical Engineering, Stanford University, Stanford, CA 94305*

*2. Department of Bioengineering, Stanford University, Stanford, CA 94305*

*\* Correspondence to James R. Swartz, Department of Chemical Engineering, Stanford University, 381 North-South Mall, Stanford, CA 94305-5025, USA; email: [jswartz@stanford.edu](mailto:jswartz@stanford.edu); telephone: 650-723-5398; fax: 650-725-0555*

# Supplementary Tables

Supplementary Table S1. The sequences of different flagellin variants.

| Variants  | Protein sequence                                                                                                                                                                                                                                                                                                                                                                                                                                                                                                                                                                        | DNA encoding sequence                                                                                                                                                                                                                                                                                                                                                                                                                                                                                                                                                                                                                                                                                                                                                                                                                                                                                                                                                                                                                                                                                                                                                                                                                                                                                                                                                                                                                                                                                                                                                                                   |
|-----------|-----------------------------------------------------------------------------------------------------------------------------------------------------------------------------------------------------------------------------------------------------------------------------------------------------------------------------------------------------------------------------------------------------------------------------------------------------------------------------------------------------------------------------------------------------------------------------------------|---------------------------------------------------------------------------------------------------------------------------------------------------------------------------------------------------------------------------------------------------------------------------------------------------------------------------------------------------------------------------------------------------------------------------------------------------------------------------------------------------------------------------------------------------------------------------------------------------------------------------------------------------------------------------------------------------------------------------------------------------------------------------------------------------------------------------------------------------------------------------------------------------------------------------------------------------------------------------------------------------------------------------------------------------------------------------------------------------------------------------------------------------------------------------------------------------------------------------------------------------------------------------------------------------------------------------------------------------------------------------------------------------------------------------------------------------------------------------------------------------------------------------------------------------------------------------------------------------------|
| Wild-type | MAQVINTNSLSLLTQNNLNKSQSAL<br>GTAIERLSSGLRINSKDDAAGQAI<br>ANRFTANIKGLTQASRNANDGISIA<br>QTTEGALNEINNNLQRVRELAVQSA<br>NSTNSQSDLLDSIQAEITQRLNEIDR<br>VSGQTQFNGVKVLAQDNTLTIQVGA<br>NDGETIDIDLKQINSQTLGLDNLNV<br>QKRYKVSdTAAATVTGYADTTIALDN<br>STFKASATGLGGTDQKIDGDLKFD<br>TTGKYAKVTVTGGTGKDGYYEVS<br>DKTNGEVTLAGGATSPLTGGLPATA<br>TEVKNVQVANADLTEAKAALTAAG<br>VTGTASVVKMSYTDNNGKTIIDGGLA<br>VKVGDYYSATQNKDGSISINTTKY<br>TADDGTSKLTALNKGADGKTEVVS<br>IGGKTYAASKAEGHNFKAQPDLEA<br>AATTTENPLQKIDAALAQVDTLRSD<br>LGAQVNRFNSAITNLGNTVNNLTS<br>RSRIEDSDYATEVSNMSRAQILQQA<br>GTSVLAQANQVPPQNVLSLLRW | ATGGCACAAGTGATTAATACAACAGCCTGTCGCTGTTGACCCAGAATAACCTGAACAAATCCCAGTCCGCTC<br>TGGGCACCCTATCGAGCGTCTGTCTCCGGTCTGCGTATCAACAGCGCGAAAGACGATGCGGCAGGTACAGGC<br>GATTGCTAACCGTTTTACCGCCAACAATAAAGGTTGACTACGGCTTCCCCTAACGCTAACGACGGTATCTCC<br>ATTGGCAGACCCACTGAAGGCGCGTGAACGAAATCAACAACAACCTGCAGCGTGTGCGTGAACCTGGCGGTT<br>CAGTCTGCTAACAGCACCCTCCAGTCTGACTCGACTCCATCCAGGCTGAAATCACCCAGCGCTGAACG<br>AAATCGACCGTGTATCCGGCCAGACTCAGTCAACGGCGTGAAGTCTGGCGCAGGACAACCCCTGACCA<br>TCCAGGTTGGTCCACAGCGGTTGAAACTATCGATATCGATCTGAAGCAGATCAACTCTCAGACCCCTGGGTCT<br>GGATACCGCTGAATGTGCAACAAAAATAAAGGTCAGCGATACGGCTGCAACTGTTACAGGATATGCCGATAC<br>TACGATTGCTTTAGACAATAGTACTTTAAAGCCTCGGCTACTGGTCTTGGTGGTACTACAGAAAATTGATG<br>GCGATTTAAAATTTGATGATACGACTGGAAAAATTACGCCAAAGTTACCGTTACGGGGGGAACCTGGTAAAG<br>ATGGCTATTGAAAGTTCCGTTGATAAGACGAAACGGTGAAGTGAAGTACTTGTCTGGCGGTGCGACTTCCCCTG<br>TACAGGTGGACTACTCGCAGCAGCAACTGAGGATGTGAAAAATGTACAAGTTGCAAAATGCTGATTTGACAGA<br>GGCTAAAGCCGATTGACAGCAGCAGGTGTTACCAGCAGCAGCATCTGTTGTTAAGATGCTTATACAGTAAAT<br>AACGGTAAAACTATTGATGGTGGTTAGCAGTTAAGGTAGGCGATGATTACTATTCTGCAACTCAAAAATAAAG<br>ATGGTCCATAAGTATTAATACTACGAAATACACTGCAGATGACGGTACACTTAAACCTGCACTAAACAACT<br>GGGTGGCGCAGACGGCAAAACCGAAGTTGTTCTATTGGTGGTAAAACITACCGTGAAGTAAAGCCGAAGG<br>TCACAACCTTAAAGCACAGCTGATCTGGCGGAAGCGGCTGTACAACCACCGAAAACCCGCTGCAGAAAAT<br>TGATGCTGCTTGGCACAGGTTGACAGCTTACGTTCTGACCTGGGTGGGTACAGAACTGGTTCACAACTGACTA<br>TTACCAACTGGGCAACACCGTAAACAACTGACTTCTGCCGTAGCCGTATCGAAGATTCCGACTACCGGAC<br>CGAAGTTTCCAACTGCTCGCGCGAGATTCTGACGACGGCCGTTACCTCGTCTGGCGCAGGCGAACCCAG<br>GTTCCGCAAAACGCTCTCTTTACTGCGT         |
|           | <b>FEK</b>                                                                                                                                                                                                                                                                                                                                                                                                                                                                                                                                                                              | <b>IGGAGCCATCCGCAGTTGAAAAATAA</b>                                                                                                                                                                                                                                                                                                                                                                                                                                                                                                                                                                                                                                                                                                                                                                                                                                                                                                                                                                                                                                                                                                                                                                                                                                                                                                                                                                                                                                                                                                                                                                       |
|           | <b>(HPG)</b>                                                                                                                                                                                                                                                                                                                                                                                                                                                                                                                                                                            | <b>ATGGCACAAGTGATTAATACAACAGCCTGTCGCTGTTGACCCAGAATAACCTGAACAAATCCCAGTCCGCTC</b><br>TGGGCACCCTATCGAGCGTCTGTCTCCGGTCTGCGTATCAACAGCGCGAAAGACGATGCGGCAGGTACAGGC<br>GATTGCTAACCGTTTTACCGCCAACAATAAAGGTTGACTACGGCTTCCCCTAACGCTAACGACGGTATCTCC<br>ATTGGCAGACCCACTGAAGGCGCGTGAACGAAATCAACAACAACCTGCAGCGTGTGCGTGAACCTGGCGGTT<br>CAGTCTGCTAACAGCACCCTCCAGTCTGACTCGACTCCATCCAGGCTGAAATCACCCAGCGCTGAACG<br>AAATCGACCGTGTATCCGGCCAGACTCAGTCAACGGCGTGAAGTCTGGCGCAGGACAACCCCTGACCA<br>TCCAGGTTGGTCCACAGCGGTTGAAACTATCGATATCGATCTGAAGCAGATCAACTCTCAGACCCCTGGGTCT<br>GGATACCGCTGAATGTGCAACAAAAATAAAGGTCAGCGATACGGCTGCAACTGTTACAGGATATGCCGATAC<br>TACGATTGCTTTAGACAATAGTACTTTAAAGCCTCGGCTACTGGTCTTGGTGGTACTGACCAAAAATTGATG<br>GCGATTTAAAATTTGATGATACGACTGGAAAAATTACGCCAAAGTTACCGTTACGGGGGGAACCTGGTAAAG<br>ATGGCTATTGAAAGTTCCGTTGATAAGACGAAACGGTGAAGTGAAGTACTTGTCTGGCGGTGCGACTTCCCCTG<br>TACAGGTGGACTACTCGCAGCAGCAACTGAGGATGTGAAAAATGTACAAGTTGCAAAATGCTGATTTGACAGA<br>GGCTAAAGCCGATTGACAGCAGCAGGTGTTACCAGCAGCAGCATCTGTTGTTAAGATCTTATACTGATAAT<br>AACGGTAAAACTATTGATGGTGGTTAGCAGTTAAGGTAGGCGATGATTACTATTCTGCAACTCAAAAATAAAG<br>ATGGTCCATAAGTATTAATACTACGAAATACACTGCAGATGACGGTACACTCAAAAATGCTACTAAACAACT<br>GGGTGGCGCAGACGGCAAAACCGAAGTTGTTCTATTGGTGGTAAAACITACCGTGAAGTAAAGCCGAAGG<br>TCACAACCTTAAAGCACAGCTGATCTGGCGGAAGCGGCTGTACAACCACCGAAAACCCGCTGCAGAAAAT<br>TGATGCTGCTTGGCACAGGTTGACAGCTTACGTTCTGACCTGGGTGGGTACAGAACTGGTTCACAACTGACTA<br>TTACCAACTGGGCAACACCGTAAACAACTGACTTCTGCCGTAGCCGTATCGAAGATTCCGACTACCGGAC<br>CGAAGTTTCCAACTGCTCGCGCGAGATTCTGACGACGGCCGTTACCTCGTCTGGCGCAGGCGAACCCAG<br>GTTCCGCAAAACGCTCTCTTTACTGCGT |
| III       | KFDDTTGKYAKVTVTGGTGKDGYY<br>EVSVDKTNGEVTLAGGATSPLTGGL<br>PATATEDVKNVQVANADLTEAKAAL<br>TAAGVTGTASVVKISYTDNNGKTI<br>DGLAVKVGDDYYSATQNKDGSISIN<br>TKYTADDGTSKLTALNKGADGKT<br>EVVYIGGKTYAASKAEGHNFKAQPD<br>LAEAAAATTTENPLQKIDAALAQVDT<br>LRSDLGAQVNRFNSAITNLGNTVNN<br>LTSARSIEDSDYATEVSNISRAQI<br>LQOAGTSVLAQANQVPPQNVLSLLRW                                                                                                                                                                                                                                                                | <b>ATGGCACAAGTGATTAATACAACAGCCTGTCGCTGTTGACCCAGAATAACCTGAACAAATCCCAGTCCGCTC</b><br>TGGGCACCCTATCGAGCGTCTGTCTCCGGTCTGCGTATCAACAGCGCGAAAGACGATGCGGCAGGTACAGGC<br>GATTGCTAACCGTTTTACCGCCAACAATAAAGGTTGACTACGGCTTCCCCTAACGCTAACGACGGTATCTCC<br>ATTGGCAGACCCACTGAAGGCGCGTGAACGAAATCAACAACAACCTGCAGCGTGTGCGTGAACCTGGCGGTT<br>CAGTCTGCTAACAGCACCCTCCAGTCTGACTCGACTCCATCCAGGCTGAAATCACCCAGCGCTGAACG<br>AAATCGACCGTGTATCCGGCCAGACTCAGTCAACGGCGTGAAGTCTGGCGCAGGACAACCCCTGACCA<br>TCCAGGTTGGTCCACAGCGGTTGAAACTATCGATATCGATCTGAAGCAGATCAACTCTCAGACCCCTGGGTCT<br>GGATACCGCTGAATGTGCAACAAAAATAAAGGTCAGCGATACGGCTGCAACTGTTACAGGATATGCCGATAC<br>TACGATTGCTTTAGACAATAGTACTTTAAAGCCTCGGCTACTGGTCTTGGTGGTACTGACCAAAAATTGATG<br>GCGATTTAAAATTTGATGATACGACTGGAAAAATTACGCCAAAGTTACCGTTACGGGGGGAACCTGGTAAAG<br>ATGGCTATTGAAAGTTCCGTTGATAAGACGAAACGGTGAAGTGAAGTACTTGTCTGGCGGTGCGACTTCCCCTG<br>TACAGGTGGACTACTCGCAGCAGCAACTGAGGATGTGAAAAATGTACAAGTTGCAAAATGCTGATTTGACAGA<br>GGCTAAAGCCGATTGACAGCAGCAGGTGTTACCAGCAGCAGCATCTGTTGTTAAGATCTTATACTGATAAT<br>AACGGTAAAACTATTGATGGTGGTTAGCAGTTAAGGTAGGCGATGATTACTATTCTGCAACTCAAAAATAAAG<br>ATGGTCCATAAGTATTAATACTACGAAATACACTGCAGATGACGGTACACTCAAAAATGCTACTAAACAACT<br>GGGTGGCGCAGACGGCAAAACCGAAGTTGTTCTATTGGTGGTAAAACITACCGTGAAGTAAAGCCGAAGG<br>TCACAACCTTAAAGCACAGCTGATCTGGCGGAAGCGGCTGTACAACCACCGAAAACCCGCTGCAGAAAAT<br>TGATGCTGCTTGGCACAGGTTGACAGCTTACGTTCTGACCTGGGTGGGTACAGAACTGGTTCACAACTGACTA<br>TTACCAACTGGGCAACACCGTAAACAACTGACTTCTGCCGTAGCCGTATCGAAGATTCCGACTACCGGAC<br>CGAAGTTTCCAACTGCTCGCGCGAGATTCTGACGACGGCCGTTACCTCGTCTGGCGCAGGCGAACCCAG<br>GTTCCGCAAAACGCTCTCTTTACTGCGT |
|           | <b>SHPOFEK</b>                                                                                                                                                                                                                                                                                                                                                                                                                                                                                                                                                                          | <b>IGGAGCCATCCGCAGTTGAAAAATAA</b>                                                                                                                                                                                                                                                                                                                                                                                                                                                                                                                                                                                                                                                                                                                                                                                                                                                                                                                                                                                                                                                                                                                                                                                                                                                                                                                                                                                                                                                                                                                                                                       |
|           | <b>(HPG)</b>                                                                                                                                                                                                                                                                                                                                                                                                                                                                                                                                                                            | <b>ATGATACAAGTGATTAATACAACAGCCTGTCGCTGTTGACCCAGAATAACCTGAACAAATCCCAGTCCGCTC</b><br>TGGGCACCCTATCGAGCGTCTGTCTCCGGTCTGCGTATCAACAGCGCGAAAGACGATGCGGCAGGTACAGGC<br>GATTGCTAACCGTTTTACCGCCAACAATAAAGGTTGACTACGGCTTCCCCTAACGCTAACGACGGTATCTCC<br>ATTGGCAGACCCACTGAAGGCGCGTGAACGAAATCAACAACAACCTGCAGCGTGTGCGTGAACCTGGCGGTT<br>CAGTCTGCTAACAGCACCCTCCAGTCTGACTCGACTCCATCCAGGCTGAAATCACCCAGCGCTGAACG<br>AAATCGACCGTGTATCCGGCCAGACTCAGTCAACGGCGTGAAGTCTGGCGCAGGACAACCCCTGACCA<br>TCCAGGTTGGTCCACAGCGGTTGAAACTATCGATATCGATCTGAAGCAGATCAACTCTCAGACCCCTGGGTCT<br>GGATACCGCTGAATGTGCAACAAAAATAAAGGTCAGCGATACGGCTGCAACTGTTACAGGATATGCCGATAC<br>TACGATTGCTTTAGACAATAGTACTTTAAAGCCTCGGCTACTGGTCTTGGTGGTACTGACCAAAAATTGATG<br>GCGATTTAAAATTTGATGATACGACTGGAAAAATTACGCCAAAGTTACCGTTACGGGGGGAACCTGGTAAAG<br>ATGGCTATTGAAAGTTCCGTTGATAAGACGAAACGGTGAAGTGAAGTACTTGTCTGGCGGTGCGACTTCCCCTG<br>TACAGGTGGACTACTCGCAGCAGCAACTGAGGATGTGAAAAATGTACAAGTTGCAAAATGCTGATTTGACAGA<br>GGCTAAAGCCGATTGACAGCAGCAGGTGTTACCAGCAGCAGCATCTGTTGTTAAGATCTTATACTGATAAT<br>AACGGTAAAACTATTGATGGTGGTTAGCAGTTAAGGTAGGCGATGATTACTATTCTGCAACTCAAAAATAAAG<br>ATGGTCCATAAGTATTAATACTACGAAATACACTGCAGATGACGGTACACTCAAAAATGCTACTAAACAACT<br>GGGTGGCGCAGACGGCAAAACCGAAGTTGTTCTATTGGTGGTAAAACITACCGTGAAGTAAAGCCGAAGG<br>TCACAACCTTAAAGCACAGCTGATCTGGCGGAAGCGGCTGTACAACCACCGAAAACCCGCTGCAGAAAAT<br>TGATGCTGCTTGGCACAGGTTGACAGCTTACGTTCTGACCTGGGTGGGTACAGAACTGGTTCACAACTGACTA<br>TTACCAACTGGGCAACACCGTAAACAACTGACTTCTGCCGTAGCCGTATCGAAGATTCCGACTACCGGAC<br>CGAAGTTTCCAACTGCTCGCGCGAGATTCTGACGACGGCCGTTACCTCGTCTGGCGCAGGCGAACCCAG<br>GTTCCGCAAAACGCTCTCTTTACTGCGT |
| IIII      | KFDDTTGKYAKVTVTGGTGKDGYY<br>EVSVDKTNGEVTLAGGATSPLTGGL<br>PATATEDVKNVQVANADLTEAKAAL<br>TAAGVTGTASVVKISYTDNNGKTI<br>DGLAVKVGDDYYSATQNKDGSISIN<br>TKYTADDGTSKLTALNKGADGKT<br>EVVYIGGKTYAASKAEGHNFKAQPD<br>LAEAAAATTTENPLQKIDAALAQVDT<br>LRSDLGAQVNRFNSAITNLGNTVNN<br>LTSARSIEDSDYATEVSNISRAQI<br>LQOAGTSVLAQANQVPPQNVLSLLRW                                                                                                                                                                                                                                                                | <b>ATGATACAAGTGATTAATACAACAGCCTGTCGCTGTTGACCCAGAATAACCTGAACAAATCCCAGTCCGCTC</b><br>TGGGCACCCTATCGAGCGTCTGTCTCCGGTCTGCGTATCAACAGCGCGAAAGACGATGCGGCAGGTACAGGC<br>GATTGCTAACCGTTTTACCGCCAACAATAAAGGTTGACTACGGCTTCCCCTAACGCTAACGACGGTATCTCC<br>ATTGGCAGACCCACTGAAGGCGCGTGAACGAAATCAACAACAACCTGCAGCGTGTGCGTGAACCTGGCGGTT<br>CAGTCTGCTAACAGCACCCTCCAGTCTGACTCGACTCCATCCAGGCTGAAATCACCCAGCGCTGAACG<br>AAATCGACCGTGTATCCGGCCAGACTCAGTCAACGGCGTGAAGTCTGGCGCAGGACAACCCCTGACCA<br>TCCAGGTTGGTCCACAGCGGTTGAAACTATCGATATCGATCTGAAGCAGATCAACTCTCAGACCCCTGGGTCT<br>GGATACCGCTGAATGTGCAACAAAAATAAAGGTCAGCGATACGGCTGCAACTGTTACAGGATATGCCGATAC<br>TACGATTGCTTTAGACAATAGTACTTTAAAGCCTCGGCTACTGGTCTTGGTGGTACTGACCAAAAATTGATG<br>GCGATTTAAAATTTGATGATACGACTGGAAAAATTACGCCAAAGTTACCGTTACGGGGGGAACCTGGTAAAG<br>ATGGCTATTGAAAGTTCCGTTGATAAGACGAAACGGTGAAGTGAAGTACTTGTCTGGCGGTGCGACTTCCCCTG<br>TACAGGTGGACTACTCGCAGCAGCAACTGAGGATGTGAAAAATGTACAAGTTGCAAAATGCTGATTTGACAGA<br>GGCTAAAGCCGATTGACAGCAGCAGGTGTTACCAGCAGCAGCATCTGTTGTTAAGATCTTATACTGATAAT<br>AACGGTAAAACTATTGATGGTGGTTAGCAGTTAAGGTAGGCGATGATTACTATTCTGCAACTCAAAAATAAAG<br>ATGGTCCATAAGTATTAATACTACGAAATACACTGCAGATGACGGTACACTCAAAAATGCTACTAAACAACT<br>GGGTGGCGCAGACGGCAAAACCGAAGTTGTTCTATTGGTGGTAAAACITACCGTGAAGTAAAGCCGAAGG<br>TCACAACCTTAAAGCACAGCTGATCTGGCGGAAGCGGCTGTACAACCACCGAAAACCCGCTGCAGAAAAT<br>TGATGCTGCTTGGCACAGGTTGACAGCTTACGTTCTGACCTGGGTGGGTACAGAACTGGTTCACAACTGACTA<br>TTACCAACTGGGCAACACCGTAAACAACTGACTTCTGCCGTAGCCGTATCGAAGATTCCGACTACCGGAC<br>CGAAGTTTCCAACTGCTCGCGCGAGATTCTGACGACGGCCGTTACCTCGTCTGGCGCAGGCGAACCCAG<br>GTTCCGCAAAACGCTCTCTTTACTGCGT |
|           | <b>SHPOFEK</b>                                                                                                                                                                                                                                                                                                                                                                                                                                                                                                                                                                          | <b>IGGAGCCATCCGCAGTTGAAAAATAA</b>                                                                                                                                                                                                                                                                                                                                                                                                                                                                                                                                                                                                                                                                                                                                                                                                                                                                                                                                                                                                                                                                                                                                                                                                                                                                                                                                                                                                                                                                                                                                                                       |
|           | <b>(HPG)</b>                                                                                                                                                                                                                                                                                                                                                                                                                                                                                                                                                                            | <b>ATGATACAAGTGATTAATACAACAGCCTGTCGCTGTTGACCCAGAATAACCTGAACAAATCCCAGTCCGCTC</b><br>TGGGCACCCTATCGAGCGTCTGTCTCCGGTCTGCGTATCAACAGCGCGAAAGACGATGCGGCAGGTACAGGC<br>GATTGCTAACCGTTTTACCGCCAACAATAAAGGTTGACTACGGCTTCCCCTAACGCTAACGACGGTATCTCC<br>ATTGGCAGACCCACTGAAGGCGCGTGAACGAAATCAACAACAACCTGCAGCGTGTGCGTGAACCTGGCGGTT<br>CAGTCTGCTAACAGCACCCTCCAGTCTGACTCGACTCCATCCAGGCTGAAATCACCCAGCGCTGAACG<br>AAATCGACCGTGTATCCGGCCAGACTCAGTCAACGGCGTGAAGTCTGGCGCAGGACAACCCCTGACCA<br>TCCAGGTTGGTCCACAGCGGTTGAAACTATCGATATCGATCTGAAGCAGATCAACTCTCAGACCCCTGGGTCT<br>GGATACCGCTGAATGTGCAACAAAAATAAAGGTCAGCGATACGGCTGCAACTGTTACAGGATATGCCGATAC<br>TACGATTGCTTTAGACAATAGTACTTTAAAGCCTCGGCTACTGGTCTTGGTGGTACTGACCAAAAATTGATG<br>GCGATTTAAAATTTGATGATACGACTGGAAAAATTACGCCAAAGTTACCGTTACGGGGGGAACCTGGTAAAG<br>ATGGCTATTGAAAGTTCCGTTGATAAGACGAAACGGTGAAGTGAAGTACTTGTCTGGCGGTGCGACTTCCCCTG<br>TACAGGTGGACTACTCGCAGCAGCAACTGAGGATGTGAAAAATGTACAAGTTGCAAAATGCTGATTTGACAGA<br>GGCTAAAGCCGATTGACAGCAGCAGGTGTTACCAGCAGCAGCATCTGTTGTTAAGATCTTATACTGATAAT<br>AACGGTAAAACTATTGATGGTGGTTAGCAGTTAAGGTAGGCGATGATTACTATTCTGCAACTCAAAAATAAAG<br>ATGGTCCATAAGTATTAATACTACGAAATACACTGCAGATGACGGTACACTCAAAAATGCTACTAAACAACT<br>GGGTGGCGCAGACGGCAAAACCGAAGTTGTTCTATTGGTGGTAAAACITACCGTGAAGTAAAGCCGAAGG<br>TCACAACCTTAAAGCACAGCTGATCTGGCGGAAGCGGCTGTACAACCACCGAAAACCCGCTGCAGAAAAT<br>TGATGCTGCTTGGCACAGGTTGACAGCTTACGTTCTGACCTGGGTGGGTACAGAACTGGTTCACAACTGACTA<br>TTACCAACTGGGCAACACCGTAAACAACTGACTTCTGCCGTAGCCGTATCGAAGATTCCGACTACCGGAC<br>CGAAGTTTCCAACTGCTCGCGCGAGATTCTGACGACGGCCGTTACCTCGTCTGGCGCAGGCGAACCCAG<br>GTTCCGCAAAACGCTCTCTTTACTGCGT |

**(HPG)** A Q V I N T N S L S L L T Q N N L N K S  
 Q S A L G T A I E R L S S G L R I N S A K D D A A  
 G Q A I A N R F T A N I K G L T Q A S R N A N D G  
 I S I A Q T T E G A L N E I N N N L Q R V R E L A  
 V Q S A N S T N S Q S D L D S I Q A E I T Q R L N  
 E I D R V S G Q T Q F N G V K V L A Q D N T L T I  
 Q V G A N D G E T I D I D L K I N S Q T L G L D  
 T L N V Q Q K Y K V S D T A A T V T G Y A D T T I  
 A L D N S T F K A S A T G L G G T D Q K I D G D L  
 K F D D T T G K Y Y A K V T V T G **(HPG)** T G K  
 D G Y Y E V S V D K T N G E V T L A G G A T S P L  
**HHII** T G G L P A T A T E D V K N V Q V A N A D L T E A  
 K A A L T A A G V T G T A S V V K I S Y T D N N G  
 K T I D G G L A V K V G D D Y S A T Q N K D G S  
 I S I N T T K Y T A D D G T S K T A L N K L G G A  
 D G K T E V V S I G G K T Y A A S K A E G H N F K  
 A Q P D L A E A A A T T E N P L Q K I D A A L A  
 Q V D T L R S D L G A V Q N R F N S A I T N L G N  
 T V N N L T S A R S I E D S D Y A T E V S N I S  
 R A Q I L Q Q A G T S V L A Q A N Q V P Q N V L S  
 L L R **W S H P Q F E K**  
**ATG** G C A C A A G T G A T T A A T A C A A A C A G C T G T C G T G T T G A C C C A G A A T A A C C T G A A C A A A T C C C A G T C C G C T C  
 T G G G C A C C G C T A T C G A G C G T C T G T C T T C C G G T C T G C G T A T C A A C A G C G C G A A A G A C G A T G C G G C A G G T C A G G C  
 G A T T G C T A A C C G T T T A C C G C G A A C A T C A A A G G T C T G A C T C A G G C T C C C G T A A C C G T A A C G A C G G T A T C T C C  
 A T T G C G C A G A C C A C T G A A G G C G C G T G A A C G A A A T C A A C A C A A C C T G C A G C G T G T G C G T G A A C T G G C G G T T  
 C A G T C G C T A A C A G C A C C A C C C A G T C G A C C T C G A C T C C A T C C A G G C T G A A A T C A C C C A G C G C T G A A C G  
 A A A T C G A C C G T G T A T C C G G C C A G A C T C A G T T C A A C G G C G T G A A A G T C C T G G C G C A G G A C A A C C C T G A C C A  
 T C C A G G T T G G T G C C A A C G A C G G T G A A A C T A T C G A T A T C G A T C T G A A G C A G A T C A A C T C T C A G A C C C T G G G T C T  
 G G A T A C G C T G A A T G T G C A A C A A A A A T A T A A G G T C A G C G A T A C G G C T G C A A C T G T T A C A G G A T A T G C C G A T A C  
 T A C G A T T G C T T T A G A C A A T A G T A C T T T T A A A G C C T C G G C T A C T G G T C T T G G T G G T A C T G A C C A G A A A A T T G A T G  
 G C G A T T T A A A A T T T G A T G A T A C G A C T G G A A A A T A T T A C C C A A A A G T T A C C G T T A C G G G G **ATG** A C T G G T A A A G  
 A T G G C T A T T A T G A A G T T T C C G T T G A T A A G A C G A A C G G T G A G G T G A C T C T T G C T G C G G T G C G A C T T C C C G C T  
 T A C A G G T G G A C T A C C T G C G A C A G C A A C T G A G G A T G T G A A A A T G T A C A A G T T G C A A G T T G C A A T G C T G A T T G A C A G A  
 G G C T A A A G C C G A T T G A C A G C A G C A G G T G T T A C C G G C A C A G C A T C T G T T G T T A A G **ATC** T C T T A T A C T G A T A A T  
 A A C C G T A A A A C T A T T A T G T G G T G T T A G C A G T T A A G G T A G G C G A T G A T T A C T A T T C T G C A A C T C A A A A T A A A G  
 A T G G T T C C A T A A G T A T T A A T A C T A C G A A A T A C A C T G C A G A T G A C G G T A C A T C C A A A A C T G C A T A A A C A A A A C T  
 G G G T G G C G C A G A C G G C A A A A C C G A A G T T G T T C T A T T G G T G G T A A A A C T T A C G C T G C A A G T A A A G C C G A A G G  
 T C A C A A C T T T A A A G C A C A G C C T G A T C T G C G G A A G C G G C T G C T A C A A C C A C C G A A A C C C G C T G C A G A A A A T  
 T G A T G C T G C T T T G G C A C A G G T T G A C A C G T T A C G T T C T G A C C T G G G T G C G G T A C A G A A C C G T T C A A C T C C G C T A  
 T T A C C A C C T G G G C A A C A C C G T A A A C A A C C T G A C T T C T G C C C G T A G C G G A T C G A A G A T T C C G A C T A C C G G A C  
 C G A A G T T T C C A A C **ATC** T C C G C G C A G A T T C T G A C A G C A G G C G G T A C C T C C G T T C T G G C C A G G C G A A C C A G  
 G T T C C G C A A A A C G T C C T C T C T T A C T G C G T **TGGAGCCATCCGCAGTTTGAAAA** T A A

CAPS represent the flagellin. **Underlined BOLD CAPS** represent the *Strep*-tag II polypeptide. The mutations were marked in red color.

Supplementary Table S2. The sequence of Hbc protein.

| Variant | Protein sequence                                                                                                                                                                                                                                                                                                                                 | DNA encoding sequence                                                                                                                                                                                                                                                                                                                                                                                                                                                                                                                                                                                                                                                                                                                                                                                                                                                                                                                                      |
|---------|--------------------------------------------------------------------------------------------------------------------------------------------------------------------------------------------------------------------------------------------------------------------------------------------------------------------------------------------------|------------------------------------------------------------------------------------------------------------------------------------------------------------------------------------------------------------------------------------------------------------------------------------------------------------------------------------------------------------------------------------------------------------------------------------------------------------------------------------------------------------------------------------------------------------------------------------------------------------------------------------------------------------------------------------------------------------------------------------------------------------------------------------------------------------------------------------------------------------------------------------------------------------------------------------------------------------|
| Hbc     | M D I D P Y K E F G A T V E L L S F L P S D F F P<br>S V R <b>CLLD</b> T A A A L Y R D A L E S P E H C S P<br>H H T A L R Q A I L C W G D L S T L A T W V G T N<br><b>(AHA)</b> E D P A S R D L V V S Y V N T N V G L K<br>F R O L L W F H I S C L T F G R E T V L E Y L V S<br>F G V W I <b>CT</b> P P A Y R P P N A P I L S T L P E T<br>T V V | A T G G A T A T C G A C C C G T A C A A A G A A T T C G G C G C A C C G T T G A A C T G C T G T C T T T C C T G C C G T C T<br>G A T T T C T C C C G T C T G T T C G T <b>TGC</b> C T G T G G A C A C C G C G C A G C A C T G T A C C G T G A C G C G C T G<br>G A A T C T C C G G A A C A T T G T T C C C G C A T C A C A C T G C G T G C G T C A G G C G A T T C T G T G C T G G G G C<br>G A C C T G <b>agc</b> A C C T G G C G A C T T G G G T T G G C A C C A A C <b>atg</b> G A A G A T C C G G C G C T C G T G A T C T G G<br>T T G T T C T T A C G T T A A C A C T A A C G T T G G T C T G A A A T T C C G T C A G C T G C T G T G G T T C C A C A T C T C<br>T T G C C T G A C T T C G G T C G T G A A A C C G T T C T G G A A T A C C T G G T T C T T T T G G T G T T G G A T T <b>TGT</b><br>A C T C C G C C G G C T T A C C G T C C G C C G A A C G C A C C G A T C C T G A G C A C C C T G C C G G A A A C C A C T G T T<br>G I G T A A T A A |

CAPS represent the Hbc protein. **Underlined** represent the mutations. The mutations for introducing a disulfide bond network were marked in red color.

## Supplementary Figures

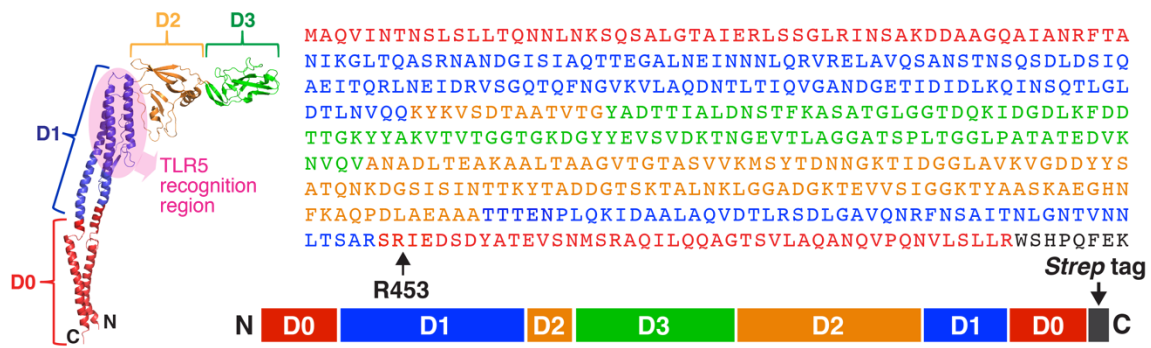

**Supplementary Figure S1.** Positions of flagellin domains (D0, D1, D2 and D3) in amino acid sequence and possible truncation position (R453).

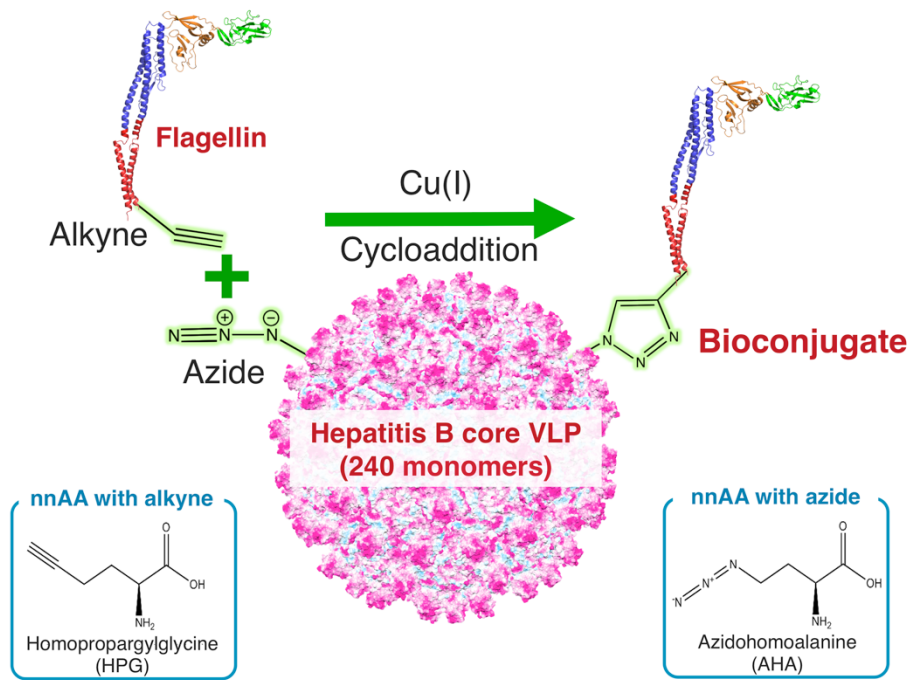

**Supplementary Figure S2.** Diagram of Cu(I)-catalyzed [3 + 2] cycloaddition click chemistry reaction for the direct coupling of flagellin proteins to HBc VLPs. The HBc VLP is stabilized by introducing a SS1(D29C-R127C) disulfide bond network<sup>1</sup>.

## Reference

1. Lu, Y., Chan, W., Ko, B. Y., VanLang, C. C. & Swartz, J. R. Assessing sequence plasticity of a virus-like nanoparticle by evolution toward a versatile scaffold for vaccines and drug delivery. *Proc. Natl. Acad. Sci. USA* **112**, 12360-12365 (2015).
